# Supplementary material for: Self-limiting population suppression gene drive in the West Nile vector mosquito, Culex quinquefasciatus
Source: Research Square preprint supplement (doi:10.21203/rs.3.rs-7120521/v1), 2025-07-21
Supplement: Supplementary file 1 [file 2577ca141e1db97374e91877.xlsx]

## Sheet: 1. Control group
Control Group 1					Date		2025-06-03	2025-07-03	2025-08-03	2025-09-03	2025-10-03	2025-11-03	2025-12-03	3/13/2025	3/14/2025	3/15/2025	3/16/2025	3/17/2025	3/18/2025	3/19/2025	3/20/2025	3/21/2025	3/22/2025	3/23/2025	3/24/2025	3/25/2025	3/26/2025	3/27/2025	3/28/2025	3/29/2025	3/30/2025	3/31/2025	2025-01-04	2025-02-04	2025-03-04	2025-04-04	2025-05-04
Cross scheme					Female-died		0	0	0	0	0	0	0	0	0	0	0	0	0	0	0	0	0	0	0	0	0	0	0	0	0	1	1	1	0	2	5
wildtype female(X10)Xwildtype male(X10)					Male-died		0	0	0	0	0	0	0	1	1	0	1	0	0	3	1	0	1	0	0	0	1	0	0	0	0	1	0
					Blood feeding							1st
					fed number							10
					laid egg number									8
Control Group
Hatch ratio
# egg raft	egg number	larva number	hatch ratio
1	160	147	0.91875
2	182	175	0.961538
3	139	129	0.928058
4	156	156	1
5	115	108	0.93913
6	179	162	0.905028
7	152	149	0.980263
8	143	141	0.986014

## Sheet: 2. GD♂ × WT♀
Experimental Group					Date		3/19/2025	3/20/2025	3/21/2025	3/22/2025	3/23/2025	3/24/2025	3/25/2025	3/26/2025	3/27/2025	3/28/2025	3/29/2025	3/30/2025	3/31/2025	2025-01-04	2025-02-04	2025-03-04	2025-04-04	2025-05-04	2025-06-04	2025-07-04	2025-08-04	2025-04-09	2025-04-10	2025-04-11	2025-04-12	2025-04-13	2025-04-14	2025-04-15
Cross scheme					GD-male-died		0	0	0	0	0	0	0	0	0	0	0	0	0	0	0	0	3	0	0	0	2	2	0	1	1	0	0	1
GD-male(X10) X wildtype-female(X10)					Blood feeding							1st
					fed number							10
					laid egg number									8
Experimental Group
Hatch ratio
# egg raft	egg number	larva number	hatch ratio
1	116	107	0.922414
2	129	92	0.713178
3	113	99	0.876106
4	79	76	0.962025
5	96	91	0.947917
6	193	188	0.974093
7	143	139	0.972028
8	167	141	0.844311
9	147	147	1

## Sheet: 3. GD intersexes × WT♂
Experimental Group					Date		2025-10-03	2025-11-03	2025-12-03	3/13/2025	3/14/2025	3/15/2025	3/16/2025	3/17/2025	3/18/2025	3/19/2025	3/20/2025	3/21/2025	3/22/2025	3/23/2025
Cross scheme					DsRed intersex-died		0	2	0	1	0	1	2	1	0	0	0	0	2	1
GD-intersex(X10) X Wildtype-male(X10)					Blood feeding							1st	2nd	3rd
					fed number							0	0	0
														0

## Sheet: 4. Non-GD intersexes × WT♂
Experimental Group (repeat 1)					Date		2025-10-03	2025-11-03	2025-12-03	3/13/2025	3/14/2025	3/15/2025	3/16/2025	3/17/2025	3/18/2025	3/19/2025	3/20/2025	3/21/2025	3/22/2025	3/23/2025	3/24/2025	3/25/2025	3/26/2025	3/27/2025	3/28/2025	3/29/2025	3/30/2025	3/31/2025	2025-01-04	2025-02-04	2025-03-04	2025-04-04	2025-05-04	2025-06-04	2025-07-04	2025-08-04	2025-04-09	2025-04-10	2025-04-11	2025-04-12	2025-04-13	2025-04-14	2025-04-15	2025-04-16	2025-04-17	2025-04-18	2025-04-19	2025-04-20	2025-04-21
Cross scheme					Intersex-died		0	0	1	0	0	0	0	0	0	0	1	0	0	0	0	0	0	0	0	0	1	1	0	0	1	0	0	0	0	0	0	1	0	0	0	0	1	0	1	1	0	0	1
Non Red intersex (x10) X WT-male(x10)					Blood feeding							1st
					fed number							9
					laid egg number														2					1
Experimental Group (repeat 2)					Date		3/17/2025	3/18/2025	3/19/2025	3/20/2025	3/21/2025	3/22/2025	3/23/2025	3/24/2025	3/25/2025	3/26/2025	3/27/2025	3/28/2025	3/29/2025	3/30/2025	3/31/2025	2025-01-04	2025-02-04	2025-03-04	2025-04-04	2025-05-04	2025-06-04	2025-07-04	2025-08-04	2025-04-09	2025-04-10	2025-04-11	2025-04-12	2025-04-13	2025-04-14	2025-04-15	2025-04-16	2025-04-17	2025-04-18	2025-04-19	2025-04-20	2025-04-21	2025-04-22	2025-04-23
Cross scheme					Intersex-died		0	0	1	1	0	0	0	0	0	1	0	1	0	0	0	0	1	0	0	0	0	0	0	0	0	1	0	1	0	0	0	0	0	0	0	1	1	1
Non Red intersex (x10) X WT-male(x10)					Blood feeding							1st		2nd
					fed number							1		7
					laid egg number																		1	1																	1
Experimental Group
Hatch ratio
# egg raft	egg number	larva number	hatch ratio
1	105	96	0.914286
2	135	122	0.903704
3	139	97	0.697842
4	106	0	0
5	130	55	0.423077

## Sheet: 5. Statistical analysis
Tukey's multiple comparisons test	Mean Diff.	95.00% CI of diff.	Below threshold?	Summary	Adjusted P Value
control group vs. GD males	3.997	-19.08 to 27.07	No	ns	0.8993	A-B
control group vs. non-GD intersexes	36.46	9.388 to 63.54	Yes	**	0.0077	A-C
