# Supplementary material for: Self-limiting population suppression gene drive in the West Nile vector mosquito, Culex quinquefasciatus
Source: Research Square preprint supplement (doi:10.21203/rs.3.rs-7120521/v1), 2025-07-21
Supplement: Supplementary file 2 [file 292e02d5c462fbb4d093407b.xlsx]

## Sheet: dsx-gRNA-1
				Sample		Aligned_Sequence	Reference_Sequence	Unedited	n_deleted	n_inserted	n_mutated	#Reads	%Reads
				non-GD females		GCTGGAGAAGCTCAACTACCCGTGGGAGATGATGCCCCTG	GCTGGAGAAGCTCAACTACCCGTGGGAGATGATGCCCCTG	TRUE	0	0	0	4580	99.19861381849685
						GCTGGAGAAGCTCAACTACCCGTGGGAGATGATGTCCCTG	GCTGGAGAAGCTCAACTACCCGTGGGAGATGATGCCCCTG	TRUE	0	0	0	12	0.2599090318388564
						GCTGGAGAAGCTCAACTACTCGTGGGAGATGATGCCCCTG	GCTGGAGAAGCTCAACTACCCGTGGGAGATGATGCCCCTG	FALSE	0	0	1	3	0.0649772579597141
						GCTGGAAAAGCTCAACTACCCGTGGGAGATGATGCCCCTG	GCTGGAGAAGCTCAACTACCCGTGGGAGATGATGCCCCTG	TRUE	0	0	0	2	0.043318171973142736
						GCTGGAGAAGCTCTAT-----------GATGATGCCCCTG	GCTGGAGAAGCTCAACTACCCGTGGGAGATGATGCCCCTG	FALSE	11	0	0	2	0.043318171973142736
						GCTGGAGAAGCTCAACTACCCGTGGGAGATGATGCCCTTG	GCTGGAGAAGCTCAACTACCCGTGGGAGATGATGCCCCTG	TRUE	0	0	0	1	0.021659085986571368
						GCTGGAGAAGCTTAACTACCCGTGGGAGATGATGCCCCTG	GCTGGAGAAGCTCAACTACCCGTGGGAGATGATGCCCCTG	TRUE	0	0	0	1	0.021659085986571368
						GCTGGAGAAGCTCAACTATCCGTGGGAGATGATGCCCCTG	GCTGGAGAAGCTCAACTACCCGTGGGAGATGATGCCCCTG	TRUE	0	0	0	1	0.021659085986571368
						GCTGGAGAAGCTCAACTACCTGTGGGAGATGATGCCCCTG	GCTGGAGAAGCTCAACTACCCGTGGGAGATGATGCCCCTG	FALSE	0	0	1	1	0.021659085986571368
						GCTGGAGAAGCTCAACTACCCGTTGGAGATGATGCCCCTG	GCTGGAGAAGCTCAACTACCCGTGGGAGATGATGCCCCTG	TRUE	0	0	0	1	0.021659085986571368
						GCTGGAGAAGCTCAACTACCCGTGGGAGATGGTGCCCCTG	GCTGGAGAAGCTCAACTACCCGTGGGAGATGATGCCCCTG	TRUE	0	0	0	1	0.021659085986571368
						GCTGGAGAAGCTCAACTACCCGTGGGAGATGATGCCTCTG	GCTGGAGAAGCTCAACTACCCGTGGGAGATGATGCCCCTG	TRUE	0	0	0	1	0.021659085986571368
						GCCGGAGAAGCTCAACTACCCGTGGGAGATGATGCCCCTG	GCTGGAGAAGCTCAACTACCCGTGGGAGATGATGCCCCTG	TRUE	0	0	0	1	0.021659085986571368
						GCTAGAGAAGCTCAACTACCCGTGGGAGATGATGCCCCTG	GCTGGAGAAGCTCAACTACCCGTGGGAGATGATGCCCCTG	TRUE	0	0	0	1	0.021659085986571368
						GCTGGAGAAGCTCAACTACCCGTGGGAGATGATGCCCCTA	GCTGGAGAAGCTCAACTACCCGTGGGAGATGATGCCCCTG	TRUE	0	0	0	1	0.021659085986571368
						GCTGGAGAAGCTCAACTACCCGTGGGAGATGATGCCCC--	GCTGGAGAAGCTCAACTACCCGTGGGAGATGATGCCCCTG	TRUE	0	0	0	1	0.021659085986571368
						GCTGGAGAAGCTCAACTACCCGTGGGAGATGATGCCC---	GCTGGAGAAGCTCAACTACCCGTGGGAGATGATGCCCCTG	TRUE	0	0	0	1	0.021659085986571368
						GCTGGAGAAGCTCAACTACCCGTGGGAGATGATGCCACTG	GCTGGAGAAGCTCAACTACCCGTGGGAGATGATGCCCCTG	TRUE	0	0	0	1	0.021659085986571368
						GCTGGAGAAGCTCAACTACCCGTGAGAGATGATGCCCCTG	GCTGGAGAAGCTCAACTACCCGTGGGAGATGATGCCCCTG	TRUE	0	0	0	1	0.021659085986571368
						GCTGGAGAAGCTCAACTACCCCTGGGAGATGATGCCCCTG	GCTGGAGAAGCTCAACTACCCGTGGGAGATGATGCCCCTG	TRUE	0	0	0	1	0.021659085986571368
						GCTGGAGAAGCTCAACTACCAGTGGGAGATGATGCCCCTG	GCTGGAGAAGCTCAACTACCCGTGGGAGATGATGCCCCTG	FALSE	0	0	1	1	0.021659085986571368
						GCTGAAGAAGCTCAACTACCCGTGGGAGATGATGCCCCTG	GCTGGAGAAGCTCAACTACCCGTGGGAGATGATGCCCCTG	TRUE	0	0	0	1	0.021659085986571368
						GTTGGAGAAGCTCAACTACCCGTGGGAGATGATGCCCCTG	GCTGGAGAAGCTCAACTACCCGTGGGAGATGATGCCCCTG	TRUE	0	0	0	1	0.021659085986571368
				Sample		Aligned_Sequence	Reference_Sequence	Unedited	n_deleted	n_inserted	n_mutated	#Reads	%Reads
				non-GD males		GCTGGAGAAGCTCAACTACCCGTGGGAGATGATGCCCCTG	GCTGGAGAAGCTCAACTACCCGTGGGAGATGATGCCCCTG	TRUE	0	0	0	1004	90.69557362240289
						GCTGGAGAA-----------------------TGCCCCTG	GCTGGAGAAGCTCAACTACCCGTGGGAGATGATGCCCCTG	FALSE	23	0	0	79	7.136404697380307
						GCTGGAGAAGCTCAACTACCCGTGGGAGATGATGTCCCTG	GCTGGAGAAGCTCAACTACCCGTGGGAGATGATGCCCCTG	TRUE	0	0	0	6	0.5420054200542006
						GCTGGAGAAGCTCAACTACCGGTGGGAGATGATGCCCCTG	GCTGGAGAAGCTCAACTACCCGTGGGAGATGATGCCCCTG	FALSE	0	0	1	3	0.2710027100271003
						GCTGTAGAAGCTCAACTACCCGTGGGAGATGATGCCCCTG	GCTGGAGAAGCTCAACTACCCGTGGGAGATGATGCCCCTG	TRUE	0	0	0	2	0.18066847335140018
						GCTGGAGAAGCTCAACTACNCGTGGGAGATGATGCCCCTG	GCTGGAGAAGCTCAACTACCCGTGGGAGATGATGCCCCTG	TRUE	0	0	0	2	0.18066847335140018
						GCTGGAGAAGCTCAACTACCCNTGGGAGATGATGCCCCTG	GCTGGAGAAGCTCAACTACCCGTGGGAGATGATGCCCCTG	TRUE	0	0	0	1	0.09033423667570009
						GNTGGAGAAGCTCAACTACCCGTGGGAGATGATGCCCCTG	GCTGGAGAAGCTCAACTACCCGTGGGAGATGATGCCCCTG	TRUE	0	0	0	1	0.09033423667570009
						GCTGGAGGAGCTCAACTACCCGTGGGAGATGATGCCCCTG	GCTGGAGAAGCTCAACTACCCGTGGGAGATGATGCCCCTG	TRUE	0	0	0	1	0.09033423667570009
						GCCGGAGAAGCTCAACTACCCGTGGGAGATGATGCCCCTG	GCTGGAGAAGCTCAACTACCCGTGGGAGATGATGCCCCTG	TRUE	0	0	0	1	0.09033423667570009
						GCTGGAGAAGCTCAACTACCCGTGGGANATGATGCCCCTG	GCTGGAGAAGCTCAACTACCCGTGGGAGATGATGCCCCTG	TRUE	0	0	0	1	0.09033423667570009
						GCTGGAGAAGCTCAACTACCCGTGGGAGATGATGCCCGTG	GCTGGAGAAGCTCAACTACCCGTGGGAGATGATGCCCCTG	TRUE	0	0	0	1	0.09033423667570009
						GCTGGAGAAGCTCAACTACCCGTGGGAGATGATGCCCCTC	GCTGGAGAAGCTCAACTACCCGTGGGAGATGATGCCCCTG	TRUE	0	0	0	1	0.09033423667570009
						GCTGGAGAAGCTCAACTACCCGTGGGAGACGATGCCCCTG	GCTGGAGAAGCTCAACTACCCGTGGGAGATGATGCCCCTG	TRUE	0	0	0	1	0.09033423667570009
						GCTGGAGAAGCTCAACTACCCGTGAGAGATGATGCCCCTG	GCTGGAGAAGCTCAACTACCCGTGGGAGATGATGCCCCTG	TRUE	0	0	0	1	0.09033423667570009
						GCTGGAGAAACTCAACTACCCGTGGGAGATGATGCCCCTG	GCTGGAGAAGCTCAACTACCCGTGGGAGATGATGCCCCTG	TRUE	0	0	0	1	0.09033423667570009
						GTTGGAGAAGCTCAACTACCCGTGGGAGATGATGCCCCTG	GCTGGAGAAGCTCAACTACCCGTGGGAGATGATGCCCCTG	TRUE	0	0	0	1	0.09033423667570009
				Sample		Aligned_Sequence	Reference_Sequence	Unedited	n_deleted	n_inserted	n_mutated	#Reads	%Reads
				non-GD intersexes		GCTGGAGAAGCTCAACTACCCGTGGGAGATGATGCCCCTG	GCTGGAGAAGCTCAACTACCCGTGGGAGATGATGCCCCTG	TRUE	0	0	0	2160	51.563619002148485
						GCTGGAGAAGCTCAACTAC--GTGGGAGATGATGCCCCTG	GCTGGAGAAGCTCAACTACCCGTGGGAGATGATGCCCCTG	FALSE	2	0	0	665	15.87491047982812
						GCTGGAGAAGCTCAACT----------GATGATGCCCCTG	GCTGGAGAAGCTCAACTACCCGTGGGAGATGATGCCCCTG	FALSE	10	0	0	608	14.514203867271425
						GCTGGAGAAGCTCATGTAT--GTATGAGATGATGCCCCTG	GCTGGAGAAGCTCAACTACCCGTGGGAGATGATGCCCCTG	FALSE	2	0	0	327	7.806158987825256
						GCTGGAGAA----------CCGTGGGAGATGATGCCCCTG	GCTGGAGAAGCTCAACTACCCGTGGGAGATGATGCCCCTG	TRUE	0	0	0	228	5.442826450226784
						GCTGGAGAAGCTCAACTACC-GTGGGAGATGATGCCCCTG	GCTGGAGAAGCTCAACTACCCGTGGGAGATGATGCCCCTG	FALSE	1	0	0	114	2.7214132251133925
						GCTGGAGAAGCTCAACTATGCCTGGGAGATGATGCCCCTG	GCTGGAGAAGCTCAACTACCCGTGGGAGATGATGCCCCTG	FALSE	0	0	1	36	0.859393650035808
						GCTGGAGAAGCTCAGAT-------GGAGATGATGCCCCTG	GCTGGAGAAGCTCAACTACCCGTGGGAGATGATGCCCCTG	FALSE	7	0	0	13	0.31033659584626405
						GCTGGAGAAGCTCAACTAC---TGGGAGATGATGCCCCTG	GCTGGAGAAGCTCAACTACCCGTGGGAGATGATGCCCCTG	FALSE	3	0	0	12	0.286464550011936
						GCTGGAGAAGCTCAACTACCCGTGGGAGATGATGTCCCTG	GCTGGAGAAGCTCAACTACCCGTGGGAGATGATGCCCCTG	TRUE	0	0	0	2	0.047744091668656
						GCTGGAGAAGCTCAACTACCCGTGTGAGATGATGCCCCTG	GCTGGAGAAGCTCAACTACCCGTGGGAGATGATGCCCCTG	TRUE	0	0	0	1	0.023872045834328
						GCTGGAGAAGCTCGACTACCCGTGGGAGATGATGCCCCTG	GCTGGAGAAGCTCAACTACCCGTGGGAGATGATGCCCCTG	TRUE	0	0	0	1	0.023872045834328
						GCTGGAGAAGCTTAACTACCCGTGGGAGATGATGCCCCTG	GCTGGAGAAGCTCAACTACCCGTGGGAGATGATGCCCCTG	TRUE	0	0	0	1	0.023872045834328
						GCTGGCGAA----------CCGTGGGAGATGATGCCCCTG	GCTGGAGAAGCTCAACTACCCGTGGGAGATGATGCCCCTG	TRUE	0	0	0	1	0.023872045834328
						GCTGGAGAAGCTCATGTAT--GTATGAGACGATGCCCCTG	GCTGGAGAAGCTCAACTACCCGTGGGAGATGATGCCCCTG	FALSE	2	0	0	1	0.023872045834328
						GCTGGGGAAGCTCAACTACCCGTGGGAGATGATGCCCCTG	GCTGGAGAAGCTCAACTACCCGTGGGAGATGATGCCCCTG	TRUE	0	0	0	1	0.023872045834328
						GCTGGAGAAGCTCAATTAC--GTGGGAGATGATGCCCCTG	GCTGGAGAAGCTCAACTACCCGTGGGAGATGATGCCCCTG	FALSE	2	0	0	1	0.023872045834328
						GCTGTAGAAGCTCAACTAC--GTGGGAGATGATGCCCCTG	GCTGGAGAAGCTCAACTACCCGTGGGAGATGATGCCCCTG	FALSE	2	0	0	1	0.023872045834328
						GCTTGAGAA----------CCGTGGGAGATGATGCCCCTG	GCTGGAGAAGCTCAACTACCCGTGGGAGATGATGCCCCTG	TRUE	0	0	0	1	0.023872045834328
						GCTGGAGAAGCTCATGTAT--GTATGAGTTGATGCCCCTG	GCTGGAGAAGCTCAACTACCCGTGGGAGATGATGCCCCTG	FALSE	2	0	0	1	0.023872045834328
						ACTGGAGAAGCTCAACTACCCGTGGGAGATGATGCCCCTG	GCTGGAGAAGCTCAACTACCCGTGGGAGATGATGCCCCTG	TRUE	0	0	0	1	0.023872045834328
						CTGGAGAAGC--ATCGTATCTGCTGGAGATGATGCCCCTG	CTGGAGAAGCTCAAC-TACCCGTGGGAGATGATGCCCCTG	FALSE	0	0	1	1	0.023872045834328
						GCTGGAGAAGCTCAACTAC--GTGGTAGATGATGCCCCTG	GCTGGAGAAGCTCAACTACCCGTGGGAGATGATGCCCCTG	FALSE	2	0	0	1	0.023872045834328
						GCTGGAGAAGCTCAACTAC--GTGGGAGATGATGTCCCTG	GCTGGAGAAGCTCAACTACCCGTGGGAGATGATGCCCCTG	FALSE	2	0	0	1	0.023872045834328
						GCTGGAGAAGCTCAACTAC--GTGGGAGATGATGCCTCTG	GCTGGAGAAGCTCAACTACCCGTGGGAGATGATGCCCCTG	FALSE	2	0	0	1	0.023872045834328
						GCTGGAGAAGCTCAACT------GGGAGATGATGCCCCTG	GCTGGAGAAGCTCAACTACCCGTGGGAGATGATGCCCCTG	FALSE	6	0	0	1	0.023872045834328
						GCTGGAGAAGCTCAACT----------GATGGTGCCCCTG	GCTGGAGAAGCTCAACTACCCGTGGGAGATGATGCCCCTG	FALSE	10	0	0	1	0.023872045834328
						GCTGGAGAAGCTCAACT----------GATGATTCCCCTG	GCTGGAGAAGCTCAACTACCCGTGGGAGATGATGCCCCTG	FALSE	10	0	0	1	0.023872045834328
						GCTGGAGAA----------CCGTGGGAGATGATGTCCCTG	GCTGGAGAAGCTCAACTACCCGTGGGAGATGATGCCCCTG	TRUE	0	0	0	1	0.023872045834328
						GCTGGAGAA----------CCGTGGGAGATGATGCCCCTN	GCTGGAGAAGCTCAACTACCCGTGGGAGATGATGCCCCTG	TRUE	0	0	0	1	0.023872045834328
						GCTGGAGAA----------CCGTGGGAGATGATGCCCATG	GCTGGAGAAGCTCAACTACCCGTGGGAGATGATGCCCCTG	TRUE	0	0	0	1	0.023872045834328
						GCTGGAGAA----------CCGTGGGAGACGATGCCCCTG	GCTGGAGAAGCTCAACTACCCGTGGGAGATGATGCCCCTG	TRUE	0	0	0	1	0.023872045834328
						GCTAGAGAAGCTCAACTACCCGTGGGAGATGATGCCCCTG	GCTGGAGAAGCTCAACTACCCGTGGGAGATGATGCCCCTG	TRUE	0	0	0	1	0.023872045834328
						GTTGGAGAAGCTCAACTATGCCTGGGAGATGATGCCCCTG	GCTGGAGAAGCTCAACTACCCGTGGGAGATGATGCCCCTG	FALSE	0	0	1	1	0.023872045834328
				Sample		Aligned_Sequence	Reference_Sequence	Unedited	n_deleted	n_inserted	n_mutated	#Reads	%Reads
				GD males		GCTGGAGAAGCTCAACTACCCGTGGGAGATGATGCCCCTG	GCTGGAGAAGCTCAACTACCCGTGGGAGATGATGCCCCTG	TRUE	0	0	0	2355	94.5024077046549
						GCTGGAGAAGCTCAACTAC--GTGGGAGATGATGCCCCTG	GCTGGAGAAGCTCAACTACCCGTGGGAGATGATGCCCCTG	FALSE	2	0	0	17	0.6821829855537721
						GCTGGAGAAGCTCAACTACC----GGAGATGATGCCCCTG	GCTGGAGAAGCTCAACTACCCGTGGGAGATGATGCCCCTG	FALSE	4	0	0	13	0.521669341894061
						X-------------------CGTGGGAGATGATGCCCCTG	GCTGGAGAAGCTCAACTACCCGTGGGAGATGATGCCCCTG	FALSE	105	0	0	10	0.4012841091492777
						GCTGGAGAAGCTCAACTACC-GTGGGAGATGATGCCCCTG	GCTGGAGAAGCTCAACTACCCGTGGGAGATGATGCCCCTG	FALSE	1	0	0	9	0.3611556982343499
						GCTGGAG-------------CGTGGGAGATGATGCCCCTG	GCTGGAGAAGCTCAACTACCCGTGGGAGATGATGCCCCTG	FALSE	13	0	0	9	0.3611556982343499
						GCTGGAGAAGCTC-------CGTGGGAGATGATGCCCCTG	GCTGGAGAAGCTCAACTACCCGTGGGAGATGATGCCCCTG	FALSE	7	0	0	8	0.32102728731942215
						GCTGGAGAAGCTCAACTACCCGTGGGAGATGATGTCCCTG	GCTGGAGAAGCTCAACTACCCGTGGGAGATGATGCCCCTG	TRUE	0	0	0	7	0.2808988764044944
						GCTGGAGAAGCTCAACTA----TGGGAGATGATGCCCCTG	GCTGGAGAAGCTCAACTACCCGTGGGAGATGATGCCCCTG	FALSE	4	0	0	7	0.28089887640449435
						GCTGGAGAAGCTCAACTACC--------------------	GCTGGAGAAGCTCAACTACCCGTGGGAGATGATGCCCCTG	FALSE	24	0	0	6	0.2407704654895666
						GCTGGAGAAGCTCAAC-----GTGGGAGATGATGCCCCTG	GCTGGAGAAGCTCAACTACCCGTGGGAGATGATGCCCCTG	FALSE	5	0	0	6	0.2407704654895666
						GCT----------------CCGTGGGAGATGATGCCCCTG	GCTGGAGAAGCTCAACTACCCGTGGGAGATGATGCCCCTG	TRUE	0	0	0	6	0.2407704654895666
						GCTGGAGAAGCTCAACTAC---TGGGAGATGATGCCCCTG	GCTGGAGAAGCTCAACTACCCGTGGGAGATGATGCCCCTG	FALSE	3	0	0	5	0.20064205457463882
						X-------------------CGTGGGAGATGATGCCCCTG	GCTGGAGAAGCTCAACTACCCGTGGGAGATGATGCCCCTG	FALSE	49	0	0	3	0.1203852327447833
						GCTGGAGAAGCA---------GTGGGAGATGATGCCCCTG	GCTGGAGAAGCTCAACTACCCGTGGGAGATGATGCCCCTG	FALSE	9	0	0	3	0.1203852327447833
						GCTGGAGAAGC---------CGTGGGAGATGATGCCCCTG	GCTGGAGAAGCTCAACTACCCGTGGGAGATGATGCCCCTG	FALSE	9	0	0	3	0.1203852327447833
						GC------------------CGTGGGAGATGATGCCCCTG	GCTGGAGAAGCTCAACTACCCGTGGGAGATGATGCCCCTG	FALSE	18	0	0	3	0.1203852327447833
						GCTGGAGAAGC-------CCCGTGGGAGATGATGCCCCTG	GCTGGAGAAGCTCAACTACCCGTGGGAGATGATGCCCCTG	TRUE	0	0	0	3	0.1203852327447833
						G-----------------------GGAGATGATGCCCCTG	GCTGGAGAAGCTCAACTACCCGTGGGAGATGATGCCCCTG	FALSE	23	0	0	2	0.08025682182985554
						GCTGGAGAAGCTCAACTACCAGTGGGAGATGATGCCCCTG	GCTGGAGAAGCTCAACTACCCGTGGGAGATGATGCCCCTG	FALSE	0	0	1	2	0.08025682182985554
						GCTGGAGAAGCTCAACTACCCGTGGGAGAAGATGCCCCTG	GCTGGAGAAGCTCAACTACCCGTGGGAGATGATGCCCCTG	TRUE	0	0	0	1	0.04012841091492777
						GCTGGAGGAGCTCAACTACCCGTGGGAGATGATGCCCCTG	GCTGGAGAAGCTCAACTACCCGTGGGAGATGATGCCCCTG	TRUE	0	0	0	1	0.04012841091492777
						GCTGGAGAAGCTCAACTGCCCGTGGGAGATGATGCCCCTG	GCTGGAGAAGCTCAACTACCCGTGGGAGATGATGCCCCTG	TRUE	0	0	0	1	0.04012841091492777
						GCTGGAGAAGCTCAACTACCCGTGGGAGATGATGCNCCTG	GCTGGAGAAGCTCAACTACCCGTGGGAGATGATGCCCCTG	TRUE	0	0	0	1	0.04012841091492777
						GCTGGAGAAGCTCAACTACCCGTGGGAGATGATGCCCATG	GCTGGAGAAGCTCAACTACCCGTGGGAGATGATGCCCCTG	TRUE	0	0	0	1	0.04012841091492777
						GCTGGAGAAGCTCAACTACCCGTGGGAGATGATACCCCTG	GCTGGAGAAGCTCAACTACCCGTGGGAGATGATGCCCCTG	TRUE	0	0	0	1	0.04012841091492777
						GCTGGAGAAGCTCAACTACCCGTGGCAGATGATGCCCCTG	GCTGGAGAAGCTCAACTACCCGTGGGAGATGATGCCCCTG	TRUE	0	0	0	1	0.04012841091492777
						GCTGGAGAAGCTCAACTACCCGTGGGAAATGATGCCCCTG	GCTGGAGAAGCTCAACTACCCGTGGGAGATGATGCCCCTG	TRUE	0	0	0	1	0.04012841091492777
						GCTGGAGAAGCTCAACTACCCGTAGGAGATGATGCCCCTG	GCTGGAGAAGCTCAACTACCCGTGGGAGATGATGCCCCTG	TRUE	0	0	0	1	0.04012841091492777
						GCTGGAGAAGCTCAACTACCC--------TGATGCCCCTG	GCTGGAGAAGCTCAACTACCCGTGGGAGATGATGCCCCTG	TRUE	0	0	0	1	0.04012841091492777
						GC------------------CGTGGGAGATGGTGCCCCTG	GCTGGAGAAGCTCAACTACCCGTGGGAGATGATGCCCCTG	FALSE	18	0	0	1	0.04012841091492777
						GCTGGAGAAGATCAACTACCCGTGGGAGATGATGCCCCTG	GCTGGAGAAGCTCAACTACCCGTGGGAGATGATGCCCCTG	TRUE	0	0	0	1	0.04012841091492777
						GCTGGAGAAGCTCAACTACC----GGAAATGATGCCCCTG	GCTGGAGAAGCTCAACTACCCGTGGGAGATGATGCCCCTG	FALSE	4	0	0	1	0.04012841091492777
						GCTGGAGAAGC----------GTGGGAGATGATGCCCCTG	GCTGGAGAAGCTCAACTACCCGTGGGAGATGATGCCCCTG	FALSE	10	0	0	1	0.04012841091492777
						GCTGTAGAAGCTCAACTACCCGTGGGAGATGATGCCCCTG	GCTGGAGAAGCTCAACTACCCGTGGGAGATGATGCCCCTG	TRUE	0	0	0	1	0.04012841091492777
				Sample		Aligned_Sequence	Reference_Sequence	Unedited	n_deleted	n_inserted	n_mutated	#Reads	%Reads
				GD intersexes		GCTGGAGAAGCTCAACTACCCGTGGGAGATGATGCCCCTG	GCTGGAGAAGCTCAACTACCCGTGGGAGATGATGCCCCTG	TRUE	0	0	0	2672	97.98313164649798
						GCTGGAGAAGCTCAACTAC--GTGGGAGATGATGCCCCTG	GCTGGAGAAGCTCAACTACCCGTGGGAGATGATGCCCCTG	FALSE	2	0	0	8	0.29336266960029334
						GCTGGAGAAGCTCAG-TATCTGCTGGAGATGATGCCCCTG	GCTGGAGAAGCTCAACTACCCGTGGGAGATGATGCCCCTG	FALSE	0	0	1	7	0.25669233590025664
						GCTGGAGAAGCTCAACTACCCGTGGGAGATGATGTCCCTG	GCTGGAGAAGCTCAACTACCCGTGGGAGATGATGCCCCTG	TRUE	0	0	0	7	0.25669233590025664
						GCTGGAGAAGCTCAAC-----GTGGGAGATGATGCCCCTG	GCTGGAGAAGCTCAACTACCCGTGGGAGATGATGCCCCTG	FALSE	5	0	0	6	0.22002200220022
						GCTGGAGAAGCTCAACTCAACGTGGGAGATGATGCCCCTG	GCTGGAGAAGCTCAACTACCCGTGGGAGATGATGCCCCTG	FALSE	0	0	1	4	0.14668133480014667
						GCTGGAGAAACTCAACTACCCGTGGGAGATGATGCCCCTG	GCTGGAGAAGCTCAACTACCCGTGGGAGATGATGCCCCTG	TRUE	0	0	0	3	0.11001100110011
						GCTGGAGAAGCT-----------GGGAGATGATGCCCCTG	GCTGGAGAAGCTCAACTACCCGTGGGAGATGATGCCCCTG	FALSE	11	0	0	3	0.11001100110011
						GCTGGAGAAGC---------CGTGGGAGATGATGCCCCTG	GCTGGAGAAGCTCAACTACCCGTGGGAGATGATGCCCCTG	FALSE	9	0	0	2	0.07334066740007333
						CCTGGAGAAGCTCAACTACCCGTGGGAGATGGTGCCCCTG	GCTGGAGAAGCTCAACTACCCGTGGGAGATGATGCCCCTG	TRUE	0	0	0	1	0.03667033370003667
						GCTGGAGAAGCTCAACTACCCGTGGGAGATGATGCTCCTG	GCTGGAGAAGCTCAACTACCCGTGGGAGATGATGCCCCTG	TRUE	0	0	0	1	0.03667033370003667
						GCTGGAGAAGCTCANCTACCCGTGGGAGATGATGCCCCTG	GCTGGAGAAGCTCAACTACCCGTGGGAGATGATGCCCCTG	TRUE	0	0	0	1	0.03667033370003667
						GCTGGAGAAGCTCAACTATCCATGGGAAATGATGCCACTC	GCTGGAGAAGCTCAACTACC--------------------	FALSE	0	86	0	1	0.03667033370003667
						GCTGGAGAAGCTCAACTACCCGTGGGANATGATGCCCCTG	GCTGGAGAAGCTCAACTACCCGTGGGAGATGATGCCCCTG	TRUE	0	0	0	1	0.03667033370003667
						GCTGGAGAAGCTCAACTACCCGTGGGAGATGTTGCCCCTG	GCTGGAGAAGCTCAACTACCCGTGGGAGATGATGCCCCTG	TRUE	0	0	0	1	0.03667033370003667
						GCTGGAGAAGCTCAACTACCCGTGGGAGATGATGCCCCTC	GCTGGAGAAGCTCAACTACCCGTGGGAGATGATGCCCCTG	TRUE	0	0	0	1	0.03667033370003667
						GCTGGAGAAGCTCAACTACCCGTGGGAGATGATGCGCCTG	GCTGGAGAAGCTCAACTACCCGTGGGAGATGATGCCCCTG	TRUE	0	0	0	1	0.03667033370003667
						GCCGGAGAAGCTCAACTACCCGTGGGAGATGATGCCCCTG	GCTGGAGAAGCTCAACTACCCGTGGGAGATGATGCCCCTG	TRUE	0	0	0	1	0.03667033370003667
						GCTGGAGAAGCTCAACTACCCGTGGGAGATGATGCCCCTA	GCTGGAGAAGCTCAACTACCCGTGGGAGATGATGCCCCTG	TRUE	0	0	0	1	0.03667033370003667
						GCTGGAGAAGCTCAACTACCCGTGGGAGATGATGCCCCCG	GCTGGAGAAGCTCAACTACCCGTGGGAGATGATGCCCCTG	TRUE	0	0	0	1	0.03667033370003667
						GCTGGAGAAGCTCAACTACCCGTGGGAGACGATGCCCCTG	GCTGGAGAAGCTCAACTACCCGTGGGAGATGATGCCCCTG	TRUE	0	0	0	1	0.03667033370003667
						GCTGGAGAAGATCAACTACCCGTGGGAGATGATGCCCCTG	GCTGGAGAAGCTCAACTACCCGTGGGAGATGATGCCCCTG	TRUE	0	0	0	1	0.03667033370003667
						GCTGAAGAAGCTCAACTACCCGTGGGAGATGATGCCCCTG	GCTGGAGAAGCTCAACTACCCGTGGGAGATGATGCCCCTG	TRUE	0	0	0	1	0.03667033370003667
						GCTGGAGAANCTCAACTACCCGTGGGAGATGATGCCCCTG	GCTGGAGAAGCTCAACTACCCGTGGGAGATGATGCCCCTG	TRUE	0	0	0	1	0.03667033370003667

## Sheet: dsx-gRNA-2
				Sample		Aligned_Sequence	Reference_Sequence	Unedited	n_deleted	n_inserted	n_mutated	#Reads	%Reads
				non-GD males		GTGGGAGATGATGCCCCTGATGTACGTGATACTGAAGGGT	GTGGGAGATGATGCCCCTGATGTACGTGATACTGAAGGGT	TRUE	0	0	0	1002	90.4332129963899
						x----------TGCCCCTGATGTACGTGATACTGAAGGGT	GTGGGAGATGATGCCCCTGATGTACGTGATACTGAAGGGT	TRUE	0	0	0	78	7.03971119133574
						GTGGGAGATGATGTCCCTGATGTACGTGATACTGAAGGGT	GTGGGAGATGATGCCCCTGATGTACGTGATACTGAAGGGT	TRUE	0	0	0	6	0.5415162454873647
						GTGGGAGATGATGCCCCTGATGTACGTGATACTGAATGGT	GTGGGAGATGATGCCCCTGATGTACGTGATACTGAAGGGT	TRUE	0	0	0	3	0.2707581227436823
						GTGGGANATGATGCCCCTGATGTACGTGATACTGAAGGGT	GTGGGAGATGATGCCCCTGATGTACGTGATACTGAAGGGT	TRUE	0	0	0	1	0.09025270758122744
						GTGGGAGATGATGCCCGTGATGTACGTGATACTGAAGGGT	GTGGGAGATGATGCCCCTGATGTACGTGATACTGAAGGGT	TRUE	0	0	0	1	0.09025270758122744
						GTGGGAGATGATGCCCCTGATGTGCGTGATACTGAAGGGT	GTGGGAGATGATGCCCCTGATGTACGTGATACTGAAGGGT	TRUE	0	0	0	1	0.09025270758122744
						GTGGGAGATGATGCCCCTGATGTATGTGATACTGAAGGGT	GTGGGAGATGATGCCCCTGATGTACGTGATACTGAAGGGT	TRUE	0	0	0	1	0.09025270758122744
						GTGGGAGATGATGCCCCTGATGTACGTGATACTGAAGNGT	GTGGGAGATGATGCCCCTGATGTACGTGATACTGAAGGGT	TRUE	0	0	0	1	0.09025270758122744
						GTGGGAGATGATGCCCCTGATGTACGTGATACTGAAGGTT	GTGGGAGATGATGCCCCTGATGTACGTGATACTGAAGGGT	TRUE	0	0	0	1	0.09025270758122744
						GTGGGAGATGATGCCCCTGATGTACGTGATACTGAAGGNT	GTGGGAGATGATGCCCCTGATGTACGTGATACTGAAGGGT	TRUE	0	0	0	1	0.09025270758122744
						GTGGGAGATGATGCCCCTGATGTACGTGATACTGAAGCGT	GTGGGAGATGATGCCCCTGATGTACGTGATACTGAAGGGT	TRUE	0	0	0	1	0.09025270758122744
						x----------TGCCCCTGATGTACGTGATACTGAAGGGT	GTGGGAGATGATGCCCCTGATGTACGTGATACTGAAGGGT	TRUE	0	0	0	1	0.09025270758122744
						GTGGGAGATGATGCCCCTGATGTACGTGATACTGAAAGGT	GTGGGAGATGATGCCCCTGATGTACGTGATACTGAAGGGT	TRUE	0	0	0	1	0.09025270758122744
						GTGGGAGATGATGCCCCTGATGTACGTGANACTGAAGGGT	GTGGGAGATGATGCCCCTGATGTACGTGATACTGAAGGGT	TRUE	0	0	0	1	0.09025270758122744
						GTGGGAGATGATGCCCCTGATGTAAGTGATACTGAAGGGT	GTGGGAGATGATGCCCCTGATGTACGTGATACTGAAGGGT	TRUE	0	0	0	1	0.09025270758122744
						GTGGGAGATGATGCCCCTGATGTA----------------	GTGGGAGATGATGCCCCTGATGTACGTGATACTGAAGGGT	TRUE	0	0	0	1	0.09025270758122744
						GTGGGAGATGATGCCCCTGATGT-----------------	GTGGGAGATGATGCCCCTGATGTACGTGATACTGAAGGGT	TRUE	0	0	0	1	0.09025270758122744
						GTGGGAGATGATGCCCCTCATGTACGTGATACTGAAGGGT	GTGGGAGATGATGCCCCTGATGTACGTGATACTGAAGGGT	TRUE	0	0	0	1	0.09025270758122744
						GTGGGAGATGAT----------------------------	GTGGGAGATGATGCCCCTGATGTACGTGATACTGAAGGGT	FALSE	135	0	0	1	0.09025270758122744
						GTGGGAGACGATGCCCCTGATGTACGTGATACTGAAGGGT	GTGGGAGATGATGCCCCTGATGTACGTGATACTGAAGGGT	TRUE	0	0	0	1	0.09025270758122744
						GTGAGAGATGATGCCCCTGATGTACGTGATACTGAAGGGT	GTGGGAGATGATGCCCCTGATGTACGTGATACTGAAGGGT	TRUE	0	0	0	1	0.09025270758122744
						NTGGGAGATGATGCCCCTGATGTACGTGATACTGAAGGGT	GTGGGAGATGATGCCCCTGATGTACGTGATACTGAAGGGT	TRUE	0	0	0	1	0.09025270758122744
				Sample		Aligned_Sequence	Reference_Sequence	Unedited	n_deleted	n_inserted	n_mutated	#Reads	%Reads
				non-GD females		Aligned_Sequence	Reference_Sequence	Unedited	n_deleted	n_inserted	n_mutated	#Reads	%Reads
						GTGGGAGATGATGCCCCTGATGTACGTGATACTGAAGGGT	GTGGGAGATGATGCCCCTGATGTACGTGATACTGAAGGGT	TRUE	0	0	0	4569	98.98180242634315
						GTGGGAGATGATGTCCCTGATGTACGTGATACTGAAGGGT	GTGGGAGATGATGCCCCTGATGTACGTGATACTGAAGGGT	TRUE	0	0	0	12	0.2599653379549393
						GTGGGAGATGATGCCCCTGATGTACGTGATACTGAATGGT	GTGGGAGATGATGCCCCTGATGTACGTGATACTGAAGGGT	TRUE	0	0	0	4	0.08665511265164644
						x-----GATGATGCCCCTGATGTACGTGATACTGAATGGT	GTGGGAGATGATGCCCCTGATGTACGTGATACTGAAGGGT	TRUE	0	0	0	2	0.04332755632582322
						GTGGGAGATGATGCCCCTGATGTACGTGA-----------	GTGGGAGATGATGCCCCTGATGTACGTGATACTGAAGGGT	TRUE	0	0	0	2	0.04332755632582322
						GTGGGAGATGATGCCCCTGATGTACGTGATACTGAAG---	GTGGGAGATGATGCCCCTGATGTACGTGATACTGAAGGGT	TRUE	0	0	0	1	0.02166377816291161
						GTGGGAGATGGTGCCCCTGATGTACGTGATACTGAAGGGT	GTGGGAGATGATGCCCCTGATGTACGTGATACTGAAGGGT	TRUE	0	0	0	1	0.02166377816291161
						GTGGGAGATGATGCCTCTGATGTACGTGATACTGAAGGGT	GTGGGAGATGATGCCCCTGATGTACGTGATACTGAAGGGT	TRUE	0	0	0	1	0.02166377816291161
						GTGGGAGATGATGCCCTTGATGTACGTGATACTGAAGGGT	GTGGGAGATGATGCCCCTGATGTACGTGATACTGAAGGGT	TRUE	0	0	0	1	0.02166377816291161
						GTGGGAGATGATGCCCCTGGTGTACGTGATACTGAAGGGT	GTGGGAGATGATGCCCCTGATGTACGTGATACTGAAGGGT	FALSE	0	0	1	1	0.02166377816291161
						GTGGGAGATGATGCCCCTGATGTATGTGATACTGAAGGGT	GTGGGAGATGATGCCCCTGATGTACGTGATACTGAAGGGT	TRUE	0	0	0	1	0.02166377816291161
						GTGGGAGATGATGCCCCTGATGTACTTGATACTGAAGGGT	GTGGGAGATGATGCCCCTGATGTACGTGATACTGAAGGGT	TRUE	0	0	0	1	0.02166377816291161
						GTGGGAGATGATGCCCCTGATGTACGTTATACTGAAGGGT	GTGGGAGATGATGCCCCTGATGTACGTGATACTGAAGGGT	TRUE	0	0	0	1	0.02166377816291161
						GTGGGAGATGATGCCCCTGATGTACGTGGTACTGAAGGGT	GTGGGAGATGATGCCCCTGATGTACGTGATACTGAAGGGT	TRUE	0	0	0	1	0.02166377816291161
						GTGGGAGATGATGCCCCTGATGTACGTGATACTGAANGGT	GTGGGAGATGATGCCCCTGATGTACGTGATACTGAAGGGT	TRUE	0	0	0	1	0.02166377816291161
						GTGGGAGATGATGCCCCTGATGTACGTGATACTGAAGGAT	GTGGGAGATGATGCCCCTGATGTACGTGATACTGAAGGGT	TRUE	0	0	0	1	0.02166377816291161
						GTGGGAGATGATGCCCCTGATGTACGTGATACTCAAGGGT	GTGGGAGATGATGCCCCTGATGTACGTGATACTGAAGGGT	TRUE	0	0	0	1	0.02166377816291161
						CTGGGAGATGATGCCCCTGATGTACGTGATACTGAAGGGT	GTGGGAGATGATGCCCCTGATGTACGTGATACTGAAGGGT	TRUE	0	0	0	1	0.02166377816291161
						GTGGGAGATGATGCCCCTGATGTACGTGATA---------	GTGGGAGATGATGCCCCTGATGTACGTGATACTGAAGGGT	TRUE	0	0	0	1	0.02166377816291161
						GTGGGAGATGATGCCCCTGATGTACGTG------------	GTGGGAGATGATGCCCCTGATGTACGTGATACTGAAGGGT	TRUE	0	0	0	1	0.02166377816291161
						GTGGGAGATGATGCCCCTGATGTACGTCATACTGAAGGGT	GTGGGAGATGATGCCCCTGATGTACGTGATACTGAAGGGT	TRUE	0	0	0	1	0.02166377816291161
						GTGGGAGATGATGCCCCTGATGTACGCGATACTGAAGGGT	GTGGGAGATGATGCCCCTGATGTACGTGATACTGAAGGGT	TRUE	0	0	0	1	0.02166377816291161
						GTGGGAGATGATGCCCCTGATGTACATGATACTGAAGGGT	GTGGGAGATGATGCCCCTGATGTACGTGATACTGAAGGGT	TRUE	0	0	0	1	0.02166377816291161
						GTGGGAGATGATGCCCCTGATGTAC---------------	GTGGGAGATGATGCCCCTGATGTACGTGATACTGAAGGGT	TRUE	0	0	0	1	0.02166377816291161
						GTGGGAGATGATGCCCCTGATCTACGTGATACTGAAGGGT	GTGGGAGATGATGCCCCTGATGTACGTGATACTGAAGGGT	TRUE	0	0	0	1	0.02166377816291161
						GTGGGAGATGATGCCCCTGATATACGTGATACTGAAGGGT	GTGGGAGATGATGCCCCTGATGTACGTGATACTGAAGGGT	TRUE	0	0	0	1	0.02166377816291161
						GTGGGAGATGATGCCCCTGACGTACGTGATACTGAAGGGT	GTGGGAGATGATGCCCCTGATGTACGTGATACTGAAGGGT	FALSE	0	0	1	1	0.02166377816291161
						GTGGGAGATGATGCCCCTAATGTACGTGATACTGAAGGGT	GTGGGAGATGATGCCCCTGATGTACGTGATACTGAAGGGT	TRUE	0	0	0	1	0.02166377816291161
						GTGGGAGATGATGCCCCT----------------------	GTGGGAGATGATGCCCCTGATGTACGTGATACTGAAGGGT	FALSE	129	0	0	1	0.02166377816291161
						GTGGGAGATGATGCCACTGATGTACGTGATACTGAAGGGT	GTGGGAGATGATGCCCCTGATGTACGTGATACTGAAGGGT	TRUE	0	0	0	1	0.02166377816291161
						GTGAGAGATGATGCCCCTGATGTACGTGATACTGAAGGGT	GTGGGAGATGATGCCCCTGATGTACGTGATACTGAAGGGT	TRUE	0	0	0	1	0.02166377816291161
						GTTGGAGATGATGCCCCTGATGTACGTGATACTGAAGGGT	GTGGGAGATGATGCCCCTGATGTACGTGATACTGAAGGGT	TRUE	0	0	0	1	0.02166377816291161
				Sample		Aligned_Sequence	Reference_Sequence	Unedited	n_deleted	n_inserted	n_mutated	#Reads	%Reads
				non-GD intersexes		GTGGGAGATGATGCCCCTGATGTACGTGATACTGAAGGGT	GTGGGAGATGATGCCCCTGATGTACGTGATACTGAAGGGT	TRUE	0	0	0	3157	75.29215358931552
						x-----GATGATGCCCCTGATGTACGTGATACTGAAGGGT	GTGGGAGATGATGCCCCTGATGTACGTGATACTGAAGGGT	TRUE	0	0	0	606	14.452659193894586
						GTATGAGATGATGCCCCTGATGTACGTGATACTGAAGGGT	GTGGGAGATGATGCCCCTGATGTACGTGATACTGAAGGGT	TRUE	0	0	0	327	7.798712139279752
						CTGGGAGATGATGCCCCTGATGTACGTGATACTGAAGGGT	GTGGGAGATGATGCCCCTGATGTACGTGATACTGAAGGGT	TRUE	0	0	0	37	0.882423086095874
						x--GGAGATGATGCCCCTGATGTACGTGATACTGAAGGGT	GTGGGAGATGATGCCCCTGATGTACGTGATACTGAAGGGT	TRUE	0	0	0	13	0.3100405437634152
						xTGGGAGATGATGCCCCTGATGTACGTGATACTGAAGGGT	GTGGGAGATGATGCCCCTGATGTACGTGATACTGAAGGGT	TRUE	0	0	0	12	0.28619127116622944
						GTGGGAGATGATGCCCCTGATGTACGTGATACTGAATGGT	GTGGGAGATGATGCCCCTGATGTACGTGATACTGAAGGGT	TRUE	0	0	0	4	0.09539709038874314
						GTGGGAGATGATGTCCCTGATGTACGTGATACTGAAGGGT	GTGGGAGATGATGCCCCTGATGTACGTGATACTGAAGGGT	TRUE	0	0	0	4	0.09539709038874314
						GTGGGAGATGATGCCCCTGATGTACGTGATACTGAAAGGT	GTGGGAGATGATGCCCCTGATGTACGTGATACTGAAGGGT	TRUE	0	0	0	3	0.07154781779155736
						GTGGGAGATGATGCCCCTGATGTACGTGATACTAAAGGGT	GTGGGAGATGATGCCCCTGATGTACGTGATACTGAAGGGT	TRUE	0	0	0	2	0.04769854519437157
						x-----GATGATGCCCCTGATGTACGTGATACTGAAGGGT	GTGGGAGATGATGCCCCTGATGTACGTGATACTGAAGGGT	TRUE	0	0	0	1	0.023849272597185785
						GTGGGAGATGATGCCCCTGATGTACGTGATACTGAAGAGT	GTGGGAGATGATGCCCCTGATGTACGTGATACTGAAGGGT	TRUE	0	0	0	1	0.023849272597185785
						GTGGGAGATGATGCCCCTGATGTACGTGATACTGAAGTGT	GTGGGAGATGATGCCCCTGATGTACGTGATACTGAAGGGT	TRUE	0	0	0	1	0.023849272597185785
						GTGGGAGATGATGCCCCTGATGTACGTGATACTTAAGGGT	GTGGGAGATGATGCCCCTGATGTACGTGATACTGAAGGGT	TRUE	0	0	0	1	0.023849272597185785
						GTGGGAGATGATGCCCCTGATGTACGTGATACTGAGGGGT	GTGGGAGATGATGCCCCTGATGTACGTGATACTGAAGGGT	TRUE	0	0	0	1	0.023849272597185785
						GTGGGAGATGATGCCCCTGATGTACGTGATACTGGAGGGT	GTGGGAGATGATGCCCCTGATGTACGTGATACTGAAGGGT	TRUE	0	0	0	1	0.023849272597185785
						GTGGGAGATGATGCCCCTGATGTACGTGGTACTGAAGGGT	GTGGGAGATGATGCCCCTGATGTACGTGATACTGAAGGGT	TRUE	0	0	0	1	0.023849272597185785
						GTGGGAGATGATGCCCCTNATGTACGTGATACTGAAGGGT	GTGGGAGATGATGCCCCTGATGTACGTGATACTGAAGGGT	TRUE	0	0	0	1	0.023849272597185785
						GTGGGAGATGATGCCTCTGATGTACGTGATACTGAAGGGT	GTGGGAGATGATGCCCCTGATGTACGTGATACTGAAGGGT	TRUE	0	0	0	1	0.023849272597185785
						GTGGTAGATGATGCCCCTGATGTACGTGATACTGAAGGGT	GTGGGAGATGATGCCCCTGATGTACGTGATACTGAAGGGT	TRUE	0	0	0	1	0.023849272597185785
						GTGGGAGATGATGCCCCTGATGTACGTGATACTCAAGGGT	GTGGGAGATGATGCCCCTGATGTACGTGATACTGAAGGGT	TRUE	0	0	0	1	0.023849272597185785
						GTGGGAGATGATGCCCCTGATGTAC---------------	GTGGGAGATGATGCCCCTGATGTACGTGATACTGAAGGGT	TRUE	0	0	0	1	0.023849272597185785
						GTGGGAGATGATGCCCCTGATGTACGTGATACAGAAGGGT	GTGGGAGATGATGCCCCTGATGTACGTGATACTGAAGGGT	TRUE	0	0	0	1	0.023849272597185785
						GTGGGAGATGATGCCCCTGATGTACATGATACTGAAGGGT	GTGGGAGATGATGCCCCTGATGTACGTGATACTGAAGGGT	TRUE	0	0	0	1	0.023849272597185785
						GTGGGAGATGATGCCCCTG---------------------	GTGGGAGATGATGCCCCTGATGTACGTGATACTGAAGGGT	FALSE	128	0	0	1	0.023849272597185785
						GTGGGAGATGATGCCCATGATGTACGTGATACTGAAGGGT	GTGGGAGATGATGCCCCTGATGTACGTGATACTGAAGGGT	TRUE	0	0	0	1	0.023849272597185785
						GTGGGAGATGATGCCC------------------------	GTGGGAGATGATGCCCCTGATGTACGTGATACTGAAGGGT	FALSE	131	0	0	1	0.023849272597185785
						GTGGGAGATGATGCC-------------------------	GTGGGAGATGATGCCCCTGATGTACGTGATACTGAAGGGT	FALSE	132	0	0	1	0.023849272597185785
						GTGGGAGATGA-----------------------------	GTGGGAGATGATGCCCCTGATGTACGTGATACTGAAGGGT	FALSE	136	0	0	1	0.023849272597185785
						GTGGGAGACGATGCCCCTGATGTACGTGATACTGAAGGGT	GTGGGAGATGATGCCCCTGATGTACGTGATACTGAAGGGT	TRUE	0	0	0	1	0.023849272597185785
						GTATGAGTTGATGCCCCTGATGTACGTGATACTGAAGGGT	GTGGGAGATGATGCCCCTGATGTACGTGATACTGAAGGGT	TRUE	0	0	0	1	0.023849272597185785
						GTATGAGACGATGCCCCTGATGTACGTGATACTGAAGGGT	GTGGGAGATGATGCCCCTGATGTACGTGATACTGAAGGGT	TRUE	0	0	0	1	0.023849272597185785
						GCTGGAGATGATGCCCCTGATGTACGTGATACTGAAGGGT	GTGGGAGATGATGCCCCTGATGTACGTGATACTGAAGGGT	TRUE	0	0	0	1	0.023849272597185785
						x-GGGAGATGATGCCCCTGATGTACGTGATACTGAAGGGT	GTGGGAGATGATGCCCCTGATGTACGTGATACTGAAGGGT	TRUE	0	0	0	1	0.023849272597185785
						x-----GATGGTGCCCCTGATGTACGTGATACTGAAGGGT	GTGGGAGATGATGCCCCTGATGTACGTGATACTGAAGGGT	TRUE	0	0	0	1	0.023849272597185785
						x-----GATGATGCCCCTGATGTACGTGATACTGAAGGGT	GTGGGAGATGATGCCCCTGATGTACGTGATACTGAAGGGT	TRUE	0	0	0	1	0.023849272597185785
						x-----GATGATGCCCCTGATGTACGTGATACTGAATGGT	GTGGGAGATGATGCCCCTGATGTACGTGATACTGAAGGGT	TRUE	0	0	0	1	0.023849272597185785
						GTGTGAGATGATGCCCCTGATGTACGTGATACTGAAGGGT	GTGGGAGATGATGCCCCTGATGTACGTGATACTGAAGGGT	TRUE	0	0	0	1	0.023849272597185785
