# Supplementary material for: Self-limiting population suppression gene drive in the West Nile vector mosquito, Culex quinquefasciatus
Source: Research Square preprint supplement (doi:10.21203/rs.3.rs-7120521/v1), 2025-07-21
Supplement: Supplementary file 4 [file 93b525797b16a372f6e23cd5.xlsx]

## Sheet: GD experiment
												G2 (single-pair) crosses
												Exp. Group	cross	G2 offspring counting						Counting Date
														DsRed+			DsRed-				Total	Male	Female	Intersex	DsRed+(All)	DsRed-(All)	Overall Inheritance	Male drive	Female drive	Overall intersexes	Male-non-drive	Female-non-drive	Female-non-drive(intersex)	note
														female	male	Intersex	female	male	intersex
												1	1	0	40	7	38	2	6	09/13/2024	93	42	38	13	47	46	0.505376	0.430108	0.0752688	0.139785	0.0215054	0.408602	0.0645161
												1	2	0	0	0	0	0	0	09/13/2024	0	0	0	0	0	0	#DIV/0!	#DIV/0!	#DIV/0!	#DIV/0!	#DIV/0!	#DIV/0!	#DIV/0!	not hatch
												1	3	0	33	11	0	0	1	09/13/2024	45	33	0	12	44	1	0.977778	0.733333	0.244444	0.266667	0	0	0.0222222
												1	4	0	24	5	4	0	2	09/13/2024	35	24	4	7	29	6	0.828571	0.685714	0.142857	0.2	0	0.114286	0.0571429
												1	5	0	33	5	15	0	1	09/13/2024	54	33	15	6	38	16	0.703704	0.611111	0.0925926	0.111111	0	0.277778	0.0185185
	G0 crosses					G1 crosses						1	6	0	25	10	1	0	6	09/13/2024	42	25	1	16	35	7	0.833333	0.595238	0.238095	0.380952	0	0.0238095	0.142857
	G0 cross	Female	Male	Date		Exp. Group	# of crosses setup	Female	Male	Date		1	7	0	25	3	2	1	16	09/13/2024	47	26	2	19	28	19	0.595745	0.531915	0.0638298	0.404255	0.0212766	0.0425532	0.340426
	1	wildtype-females (X30)	P69: Culex-GD-males (X30)	08/21/2024		1	20	wildtype-females	P69-DsRed+_GD_males	09/05/2024		1	8	0	25	22	1	1	10	09/13/2024	59	26	1	32	47	12	0.79661	0.423729	0.372881	0.542373	0.0169492	0.0169492	0.169492
												1	9	0	44	9	15	1	4	09/13/2024	73	45	15	13	53	20	0.726027	0.60274	0.123288	0.178082	0.0136986	0.205479	0.0547945
												1	10	0	7	1	5	0	0	09/13/2024	13	7	5	1	8	5	0.615385	0.538462	0.0769231	0.0769231	0	0.384615	0
												1	11	0	6	1	4	0	1	09/13/2024	12	6	4	2	7	5	0.583333	0.5	0.0833333	0.166667	0	0.333333	0.0833333
	G0 crosses					G1 crosses						1	12	0	31	14	10	0	2	09/13/2024	57	31	10	16	45	12	0.789474	0.54386	0.245614	0.280702	0	0.175439	0.0350877
	G0 cross	Female	Male	Date		Exp. Group	# of crosses setup	Female	Male	Date		1	13	0	19	7	8	0	0	09/13/2024	34	19	8	7	26	8	0.764706	0.558824	0.205882	0.205882	0	0.235294	0
	1	wildtype-females (X30)	P69: Culex-GD-males (X30)	02/03/2025		2	20	wildtype-females	P69-DsRed+_GD_males	02/17/2025		1	14	0	17	5	4	0	4	09/13/2024	30	17	4	9	22	8	0.733333	0.566667	0.166667	0.3	0	0.133333	0.133333
												1	15	0	7	1	1	0	8	09/13/2024	17	7	1	9	8	9	0.470588	0.411765	0.0588235	0.529412	0	0.0588235	0.470588
												1	16	0	27	6	25	0	2	09/13/2024	60	27	25	8	33	27	0.55	0.45	0.1	0.133333	0	0.416667	0.0333333
												1	17	0	3	10	1	0	4	09/13/2024	18	3	1	14	13	5	0.722222	0.166667	0.555556	0.777778	0	0.0555556	0.222222
												1	18	0	10	5	13	0	1	09/13/2024	29	10	13	6	15	14	0.517241	0.344828	0.172414	0.206897	0	0.448276	0.0344828
												1	19	0	13	0	6	1	0	09/13/2024	20	14	6	0	13	7	0.65	0.65	0	0	0.05	0.3	0
												1	20	0	8	2	12	0	1	09/13/2024	23	8	12	3	12	3	0.521739	0.347826	0.0869565	0.130435	0	0.521739	0.0434783
												2	1	0	86	30	5	1	26	02/27/2025	148	87	5	56	116	32	0.783784	0.581081	0.202703	0.378378	0.00675676	0.0337838	0.175676
												2	2	0	82	43	21	4	11	02/27/2025	161	86	21	54	125	36	0.776398	0.509317	0.267081	0.335404	0.0248447	0.130435	0.068323
												2	3	0	53	11	20	1	21	02/27/2025	106	54	20	32	64	42	0.603774	0.5	0.103774	0.301887	0.00943396	0.188679	0.198113
												2	4	0	66	39	13	1	13	02/27/2025	132	67	13	52	105	27	0.795455	0.5	0.295455	0.393939	0.00757576	0.0984848	0.0984848
												2	5	0	42	12	6	0	4	02/27/2025	64	42	6	16	54	10	0.84375	0.65625	0.1875	0.25	0	0.09375	0.0625
												2	6	0	29	13	5	1	7	02/27/2025	55	30	5	20	42	13	0.763636	0.527273	0.236364	0.363636	0.0181818	0.0909091	0.127273
												2	7	0	19	5	10	1	2	02/27/2025	37	20	10	7	24	13	0.648649	0.513514	0.135135	0.189189	0.027027	0.27027	0.0540541
												2	8	0	23	17	6	1	8	02/27/2025	55	24	6	25	40	15	0.727273	0.418182	0.309091	0.454545	0.0181818	0.109091	0.145455
												2	9	0	15	2	2	0	0	02/27/2025	19	15	2	2	17	2	0.894737	0.789474	0.105263	0.105263	0	0.105263	0
												2	10	0	22	1	20	0	6	02/27/2025	49	22	20	7	23	26	0.469388	0.44898	0.0204082	0.142857	0	0.408163	0.122449
												2	11	0	18	11	5	1	6	02/27/2025	41	19	5	17	29	12	0.707317	0.439024	0.268293	0.414634	0.0243902	0.121951	0.146341
												2	12	0	63	4	35	0	10	02/27/2025	112	63	35	14	67	45	0.598214	0.5625	0.0357143	0.125	0	0.3125	0.0892857
												2	13	0	50	5	4	4	26	02/27/2025	89	54	4	31	55	34	0.617978	0.561798	0.0561798	0.348315	0.0449438	0.0449438	0.292135
												2	14	0	77	16	33	1	45	02/27/2025	172	78	33	61	93	79	0.540698	0.447674	0.0930233	0.354651	0.00581395	0.19186	0.261628
