# Supplementary material for: Self-limiting population suppression gene drive in the West Nile vector mosquito, Culex quinquefasciatus
Source: Research Square preprint supplement (doi:10.21203/rs.3.rs-7120521/v1), 2025-07-21
Supplement: Supplementary file 5 [file a854677a6f6394ca711e84bb.xlsx]

## Sheet: Sheet1
Injection											G0 Pool Crosses					Counting
Injection condition									G0 crossed to wt						G1 Offspring Phenotype scoring
Experiment	Injected mix	Line	Date	Marker	Injected Eggs	Conc.	Adults	Survival	Sex	Injected G0 #	Code	X Line	X Oppo.Sex #	Setup date	1st BF date (3 days in row)	1st egg induction date	Counting Date	DsRed+; GFP-	DsRed+;GFP+
Culex population suppression GD injection	XP069	Culex quinquefasciatus (Wuhan, China)	2024-02-24	Opie2-DsRed+	500	300ng/ul	65	0.13	Male	39	MP1	Cq. wildtype	100	2024-03-02	2024-03-06	2024-03-09	2024-03-15	4983	6
									Female	24	FP1	Cq. wildtype	30	2024-03-02	2024-03-06	2024-03-09	3/15/2024	1208	0
