# Supplementary material for: Self-limiting population suppression gene drive in the West Nile vector mosquito, Culex quinquefasciatus
Source: Research Square preprint supplement (doi:10.21203/rs.3.rs-7120521/v1), 2025-07-21
Supplement: Supplementary file 6 [file b53745f583d6427164b54ec9.xlsx]

## Sheet: competitive experiment
Cross Scheme			Cage set up Date	Blood feeding date	Egg laying date		Counting Data
WT-male(10) ; GD-male(10); WT-virgin female(10)			2025-05-02	2025-08-02	02/11/2025-02/12/2025		Egg raft #	DsRed+	DsRed-	Total
							1	0	98	98
							2	0	123	123
							3	75	28	103
							4	58	58	116
							5	55	42	97
							6	25	16	41
							7	0	107	107
